# Supplementary material
Source: PubMed Central journal article supplement (PMC10408554)
Supplement: sj-pdf-1-ebm-10.1177_15353702231151959.pdf [file sj-pdf-1-ebm-10.1177_15353702231151959.pdf]

# **TGF- $\beta$ receptor I inhibitor may restrict the induction of EMT in inflamed intestinal epithelial cells**

Mahsa Ghorbaninejad<sup>1</sup>, Meghdad Abdollahpour-Alitappeh<sup>2</sup>, Shabnam Shahrokh<sup>3</sup>, Sara Fayazzadeh<sup>4</sup>,  
Hamid Asadzadeh-Aghdaei<sup>1</sup>, Anna Meyfour<sup>1\*</sup>

<sup>1</sup>Basic and Molecular Epidemiology of Gastrointestinal Disorders Research Center, Research Institute for Gastroenterology and Liver Diseases, Shahid Beheshti University of Medical Sciences, Tehran, Iran

<sup>2</sup>Cellular and Molecular Biology Research Center, Larestan University of Medical Sciences, Larestan, Iran

<sup>3</sup>Gastroenterology and Liver Diseases Research Center, Research Institute for Gastroenterology and Liver Diseases, Shahid Beheshti University of Medical Sciences, Tehran, Iran

<sup>4</sup>Bioinformatics and Computational Omics Lab (BioCOOL), Department of Biophysics, Faculty of Biological Sciences, Tarbiat Modares University, Tehran, Iran

## **Corresponding author:**

**Anna Meyfour**, Ph.D., Research Institute for Gastroenterology and Liver Diseases, Shahid Beheshti University of Medical Sciences, Arabi Ave., Daneshjoo Blvd., Velenjak, Tehran, Iran. Postal Code: 1985717413, Tel: +98 21 22432521. Email: a.meyfour@sbmu.ac.ir

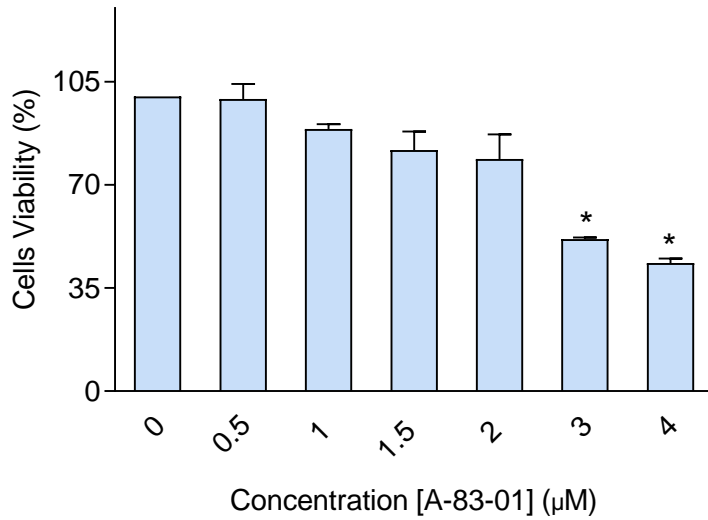

**Supplementary Fig1.** The cells were treated with different concentrations of TGF- $\beta$  (0, 0.5, 1, 1.5, 2, 3 and 4  $\mu$ M, respectively) for 24 hours, and the cell viability was determined by MTS assay. Data are expressed as the mean $\pm$  SEM (n=3) and significant differences are highlighted: \*p<0.05.

**Supplementary Table 1.** List of primers used for quantitative real time (qRT)-PCR

| Gene name       | Primer sequence 5' → 3'                                 | Product size |
|-----------------|---------------------------------------------------------|--------------|
| <i>GAPDH</i>    | F: CTCATTTCTGGTATGACAACGA<br>R: CTCCTCTTGTGCTCTTGCT     | 121          |
| <i>OCCLUDIN</i> | F: CCACGCCGGTTCCTGAAGTGG<br>R: TCACAGGACTCGCCGCCAGT     | 199          |
| <i>CLAUDIN7</i> | F: AGCTGCAAAATGTACGACTCG<br>R: GGAGACCACCATTAGGGCTC     | 75           |
| <i>ZO-1</i>     | F: CGGTCCTCTGAGCCTGTAAG<br>R: GGATCTACATGCGACGACAA      | 371          |
| <i>VIMENTIN</i> | F: AAACCTTAGGGGCGCTCTTGT<br>R: TGAGGGCTCCTAGCGGTTTA     | 163          |
| <i>CDH1</i>     | F: CGAGAGCTACACGTTACCGG<br>R: GGGTGTCGAGGGAAAAATAGG     | 119          |
| <i>CDH2</i>     | F: TCAGGCGTCTGTAGAGGCTT<br>R: ATGCACATCCTTCGATAAAGACTG  | 94           |
| <i>SNAI1</i>    | F: CCAGAGTTTACCTTCCAGCA<br>R: GATGAGCATTGGCAGCGA        | 102          |
| <i>SNAI2</i>    | F: AACTACAGCGAACTGGACAC<br>R: GGATCTCTGGTTGTGGTATGAC    | 91           |
| <i>CTNNB1</i>   | F: CATCTACACAGTTTGATGCTGCT<br>R: GCAGTTTTGTCAGTTCAGGGA  | 151          |
| <i>ACTA2</i>    | F: AAAAGACAGCTACGTGGGTGA<br>R: GCCATGTTCTATCGGGTACTTC   | 76           |
| <i>TGF-β</i>    | F: CCCAGCATCTGCAAAGCTC<br>R: GTCAATGTACAGCTGCCGCA       | 101          |
| <i>SMAD4</i>    | F: CTCATGTGATCTATGCCCGTC<br>R: AGGTGATACAACCTCGTTCGTAGT | 146          |
| <i>GAPDH</i>    | F: GACTTCAACAGCAACTCCCAC<br>R: TCCACCACCCTGTTGCTGTA     | 125          |

**Supplementary Table 2.** Detail information about the Antibody used for western blot.

| Antibody         | Cat no.    | Company        | Dilution |
|------------------|------------|----------------|----------|
| Vimentin         | ab71144    | Abcam          | 1:2500   |
| E-Cadherin       | ab231303   | Abcam          | 1:1000   |
| $\beta$ -Catenin | SC7963     | Santa cruz     | 1:1000   |
| $\alpha$ -SMA    | MA5-15871  | Invitrogen     | 1:1000   |
| p-SMAD2          | E-AB-21040 | Elabscience    | 1:1000   |
| p-SMAD3          | E-AB-21040 | Elabscience    | 1:1000   |
| p-AKT            | 40S85      | Cell signaling | 1:1000   |
| RPS6             | MAB54361   | R&D            | 1:500    |
| $\beta$ -Actin   | 60008-1-Ig | Proteintech    | 1:20000  |

**Supplementary Table 3.** Demographic characteristics of patients included in the study.

CD: Crohn's disease, UC: Ulcerative colitis, BMI: Body mass index

| Variable                 | Patients    |             | Healthy Controls |
|--------------------------|-------------|-------------|------------------|
|                          | UC          | CD          |                  |
| Number of patients       | 20          | 16          | 24               |
| Age (year)               | 38.50±14.58 | 41.75±12.91 | 39.08±14.20      |
| Gender                   |             |             |                  |
| - Male                   | 68%         | 75%         | 50%              |
| - Female                 | 32%         | 25%         | 50%              |
| BMI (kg/m <sup>2</sup> ) | 27.49±5.27  | 26.12±5.92  | 25.94±4.53       |
| Family history           | 0           | 0           | 0                |
| History of surgery       | 0           | 0           | 0                |
| Smoking status           |             |             |                  |
| - Smoker                 | 3 (20%)     | 7 (53.84%)  | 2 (10%)          |
| - Non-smoker             | 12 (80%)    | 6 (46.16%)  | 18 (90%)         |
| Disease duration (month) | 58±32.01    | 59±31.34    | 0                |
